# Supplementary material for: Construction of Bi2MoO6/g-C3N4 heterostructures with enhanced visible light photocatalytic performance
Source: Royal Society of Chemistry journal article supplement (doi:10.1039/d1nj03664e), 2021-01-01
Supplement: d1nj03664e1.pdf [file d1nj03664e1.pdf]

Electronic Supplementary Material (ESI) for New Journal of Chemistry.

## Supporting information

### Construction of $\text{Bi}_2\text{MoO}_6/\text{g-C}_3\text{N}_4$ heterostructure with enhanced visible light photocatalytic performance

Guangxin Zhang\*, Jianguang Fang, Haoran Xu, Jingmiao Hu

*School of Materials Science and Engineering, Shandong University of Science and Technology,*

*Qingdao 266590, PR China*

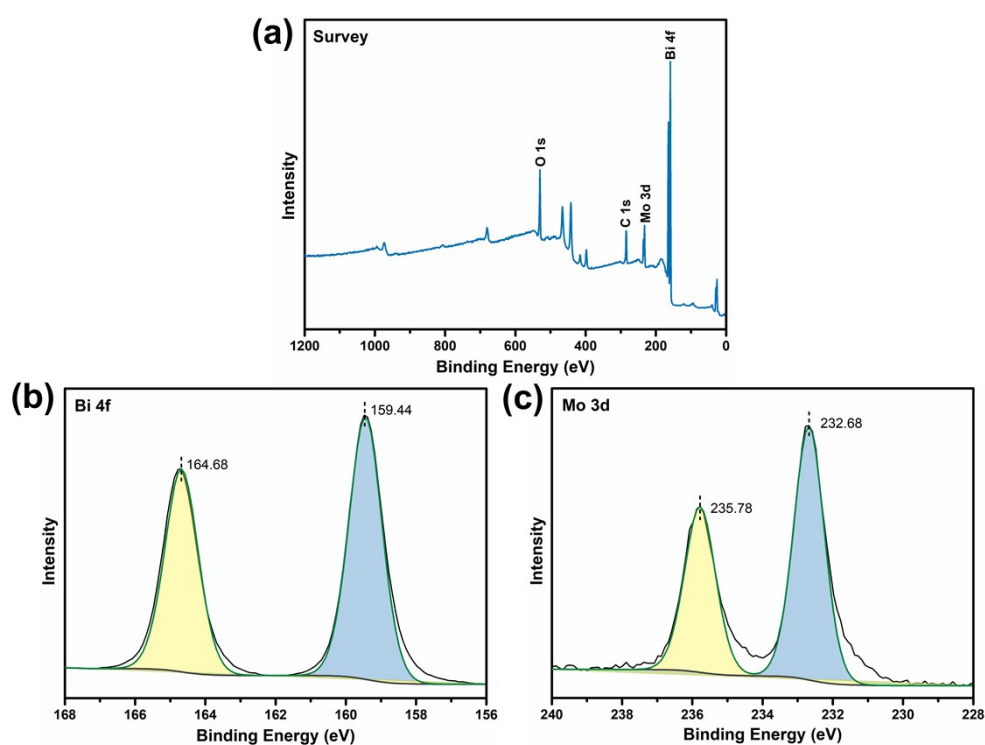

**Fig. S1.** XPS spectra of  $\text{Bi}_2\text{MoO}_6$  (a) survey, (b) Bi4f, and (c) Mo 3d.

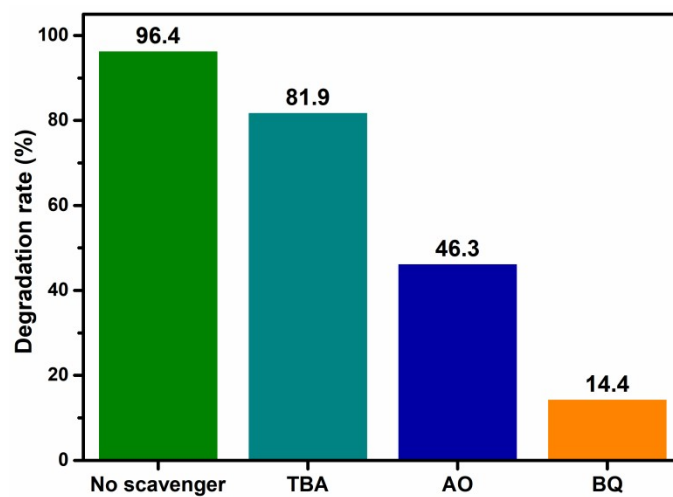

Fig. S2. Free radical quenching experiments of BiC-1 for RhB degradation.

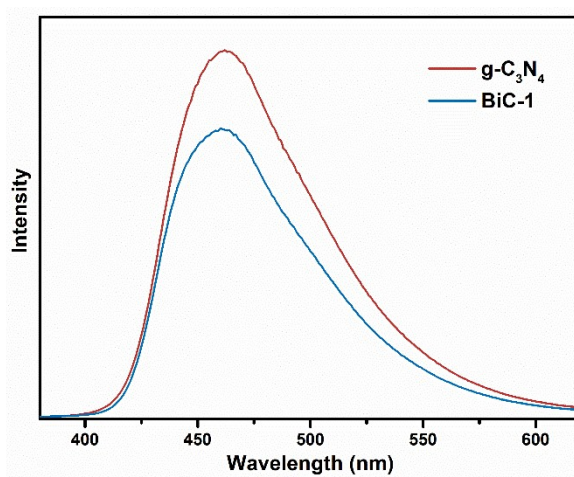

Fig. S3. PL spectra of  $g\text{-C}_3\text{N}_4$  and BiC-1.

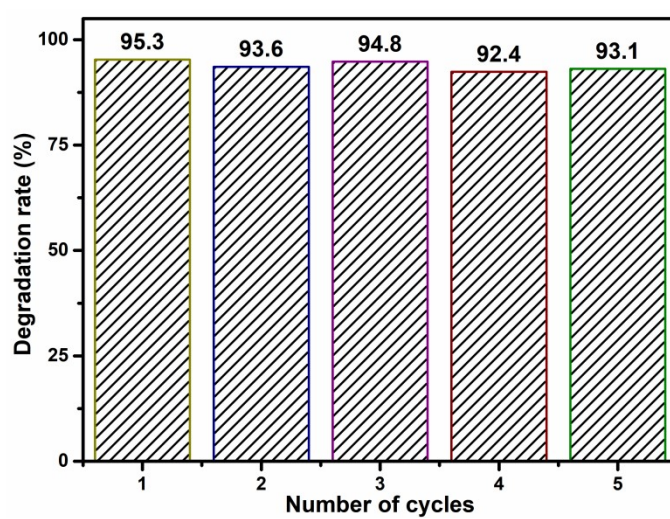

Fig. S4. Reusability of BiC-1 for RhB degradation.

**Table S1** Comparison of photocatalytic performance of Bi<sub>2</sub>MoO<sub>6</sub>/g-C<sub>3</sub>N<sub>4</sub> photocatalysts

| Photocatalysts                                                       | Light source               | Dosage                  | Initial concentration           | Degradation efficiency | Reference |
|----------------------------------------------------------------------|----------------------------|-------------------------|---------------------------------|------------------------|-----------|
| Bi <sub>2</sub> MoO <sub>6</sub> /g-C <sub>3</sub> N <sub>4</sub>    | 300 W xenon lamp (>400 nm) | 0.4 g/L                 | 10 mg/L RhB                     | 75% (120 min)          | [1]       |
| Bi <sub>2</sub> MoO <sub>6</sub> /g-C <sub>3</sub> N <sub>4-x</sub>  | 300 W xenon lamp           | 0.1 g/L                 | 10 mg/L RhB                     | 95% (60 min)           | [2]       |
| Bi <sub>2</sub> MoO <sub>6</sub> -g-C <sub>3</sub> N <sub>4</sub>    | 500 W xenon lamp (≥420 nm) | 0.4 g/L                 | 10 mg/L RhB                     | 97% (50 min)           | [3]       |
| Bi <sub>2</sub> MoO <sub>6</sub> /g-C <sub>3</sub> N <sub>4</sub>    | 50 W LED light (410 nm)    | 1 g/L                   | 10 mg/L MB                      | 97% (40 min)           | [4]       |
| Bi <sub>2</sub> MoO <sub>6</sub> /g-C <sub>3</sub> N <sub>4</sub>    | 300 W xenon lamp (≥400 nm) | 0.8 g/L                 | 1.25×10 <sup>-5</sup> mol/L RhB | 99% (40 min)           | [5]       |
| Bi <sub>2</sub> MoO <sub>6</sub> /g-C <sub>3</sub> N <sub>4</sub>    | 400 W xenon lamp (≥420 nm) | 0.4 g/L                 | 10 mg/L RhB                     | 98% (70 min)           | [6]       |
| Bi <sub>2</sub> MoO <sub>6</sub> /g-C <sub>3</sub> N <sub>4</sub>    | 300 W xenon lamp (>420 nm) | 1 g/L                   | 1×10 <sup>-5</sup> mol/L RhB    | 72% (360 min)          | [7]       |
| g-C <sub>3</sub> N <sub>4</sub> /C@Bi <sub>2</sub> MoO <sub>6</sub>  | 500 W xenon lamp (>420 nm) | 1 g/L                   | 15 mg/L β-naphthol              | 72% (150 min)          | [8]       |
| Bi <sub>2</sub> MoO <sub>6</sub> /g-C <sub>3</sub> N <sub>4</sub>    | 300 W xenon lamp (>420 nm) | 0.2 g/L                 | 10 mg/L naproxen                | 83% (60 min)           | [9]       |
| Bi <sub>2</sub> MoO <sub>6</sub> /Bi/g-C <sub>3</sub> N <sub>4</sub> | 300 W xenon lamp (>420 nm) | 0.75 mg/cm <sup>2</sup> | 200 ppm HCHO                    | 96.15% (600 min)       | [10]      |
| Bi <sub>2</sub> MoO <sub>6</sub> /g-C <sub>3</sub> N <sub>4</sub>    | 300 W xenon lamp (>400 nm) | 1 g/L                   | 10 mg/L RhB                     | 96.4% (16 min)         | This work |

## References

- [1] K. Xia, H. Chen, M. Mao, Z. Chen, F. Xu, J. Yi, Y. Yu, X. She, H. Xu, H. Li, *Phys. Status Solidi A*, 2018, **215**, 1800520.
- [2] B. Zhou, Q. Liu, S. Zhang, M. Sanjrani, H. Yang, S. Xia, *Chem. Phys. Lett.*, 2020, **748** 137381.
- [3] Q. Liang, M. Zhang, C. Yao, C. Liu, S. Xu, Z. Li, *J. Photochem. Photobiol., A*, 2017, **332**, 357-363.
- [4] J. Lv, K. Dai, J. Zhang, L. Geng, C. Liang, Q. Liu, G. Zhu, C. Chen, *Appl. Surf. Sci.*, 2015, **358**, 377-384.
- [5] W. Chen, G.-R. Duan, T.-Y. Liu, S.-M. Chen, X.-H. Liu, *Mater. Sci. Semicond. Process.*, 2015, **35**, 45-54.
- [6] H. Li, J. Liu, W. Hou, N. Du, R. Zhang, X. Tao, *Appl. Catal., B*, 2014, **160-161**, 89-97.
- [7] K. Xiao, H. Huang, N. Tian, Y. Zhang, *Mater. Res. Bull.*, 2016, **83**, 172-178.
- [8] T. Ma, J. Wu, Y. Mi, Q. Chen, D. Ma, C. Chai, *Sep. Purif. Technol.*, 2017, **183**, 54-65.
- [9] K. Fu, Y. Pan, C. Ding, J. Shi, H. Deng, *J. Photochem. Photobiol., A*, 2021, **412**, 113235.
- [10] Y. Wu, M. Song, Z. Chai, J. Huang, X. Wang, *ACS Sustainable Chem. Eng.*, 2020, **8**, 7710-7720.
